# Supplementary material for: Controllable fabrication of novel pH-, thermo-, and light-responsive supramolecular dendronized copolymers with dual self-assembly behavior
Source: Royal Society of Chemistry journal article supplement (doi:10.1039/c8py00448j), 2018-01-01
Supplement: c8py00448j1.pdf [file c8py00448j1.pdf]

## Supporting Information

# Controllable Fabrication of the Novel pH-, Thermo-, and Light-Responsive Supramolecular Dendronized Copolymers with Dual Self-Assembly Behavior

*ChangAn Yang,<sup>\*1</sup> Ling Chen,<sup>1</sup> He Huang,<sup>1</sup> Tuo Ji,<sup>1</sup> YingXiang Jiang,<sup>1</sup> Xiaobo Chen,<sup>\*2</sup>*

*CongShan Zhou,<sup>\*1</sup>*

<sup>1</sup>Department of Chemistry and Chemical Engineering, Hunan Institute of Science and Technology, Yueyang 414006, Hunan Province, PR China.

<sup>2</sup>Department of Chemistry, University of Missouri – Kansas City, Kansas City, MO 64110, USA.

**Corresponding Authors:** Chang\_anyang@163.com (ChangAn Yang),  
[chenxiaobo@umkc.edu](mailto:chenxiaobo@umkc.edu), [zhoucongsh@126.com](mailto:zhoucongsh@126.com)

Figure S1-S10 and Table S1.

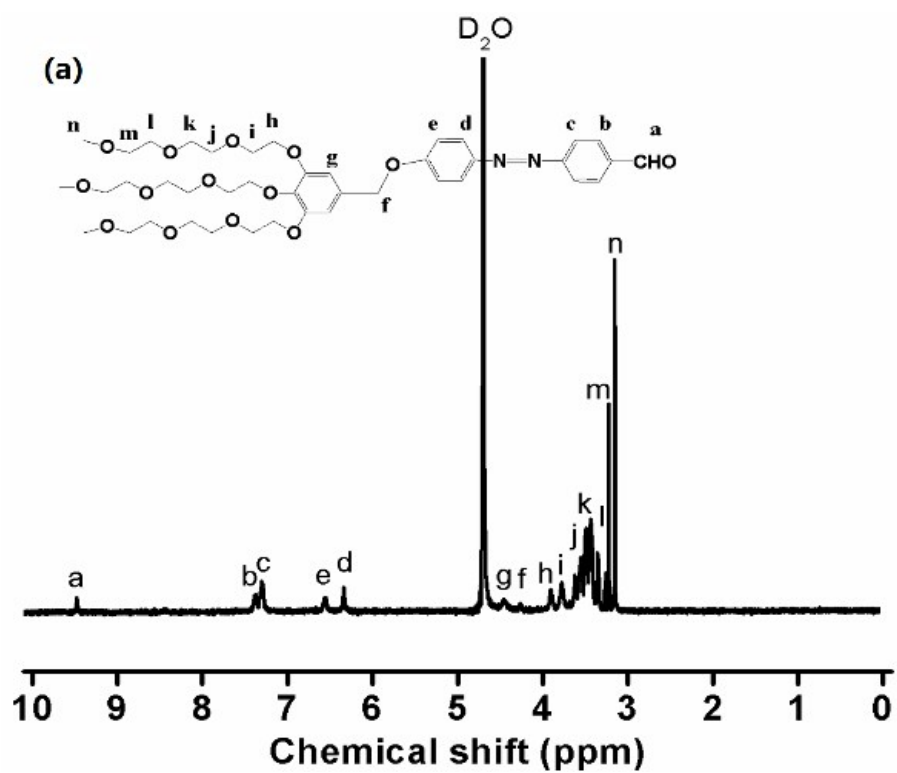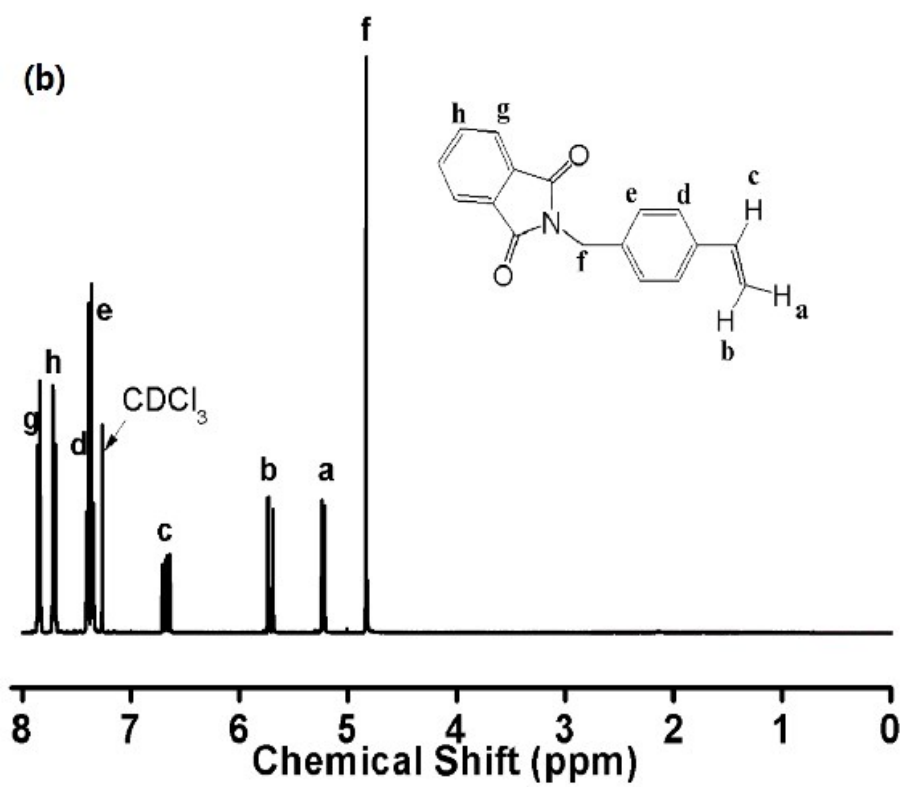

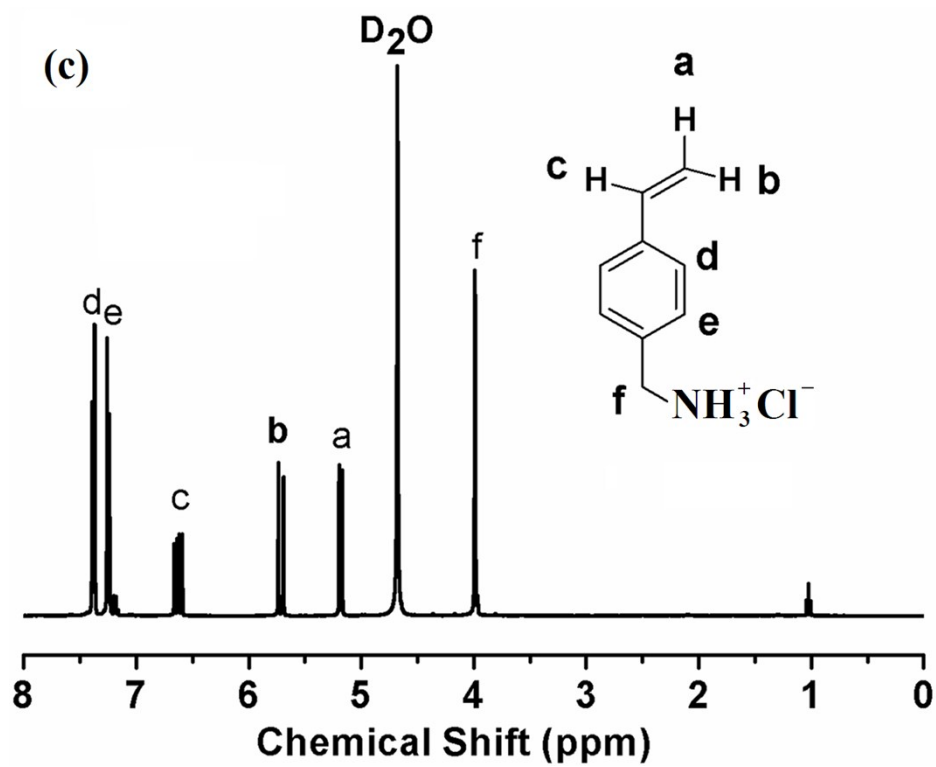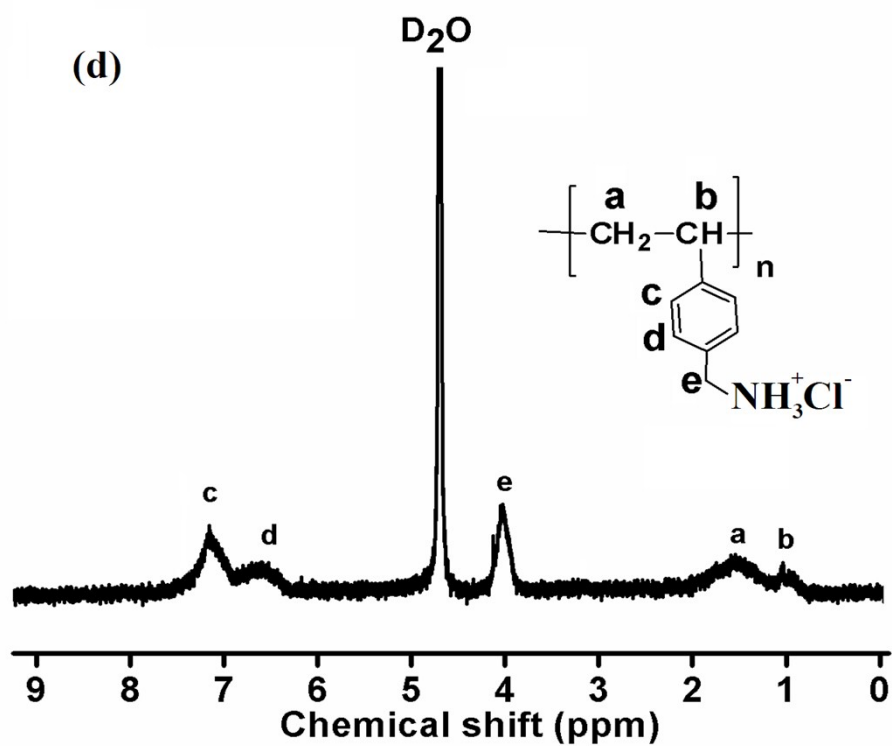

**Figure S1.**  $^1\text{H}$  NMR spectra of G1-Azo-CHO (a), N-(4-Vinylphenyl) phthalimide (b), 4-VBAHS (c) and the polymer PVBAHS (d) and in  $\text{D}_2\text{O}$ .

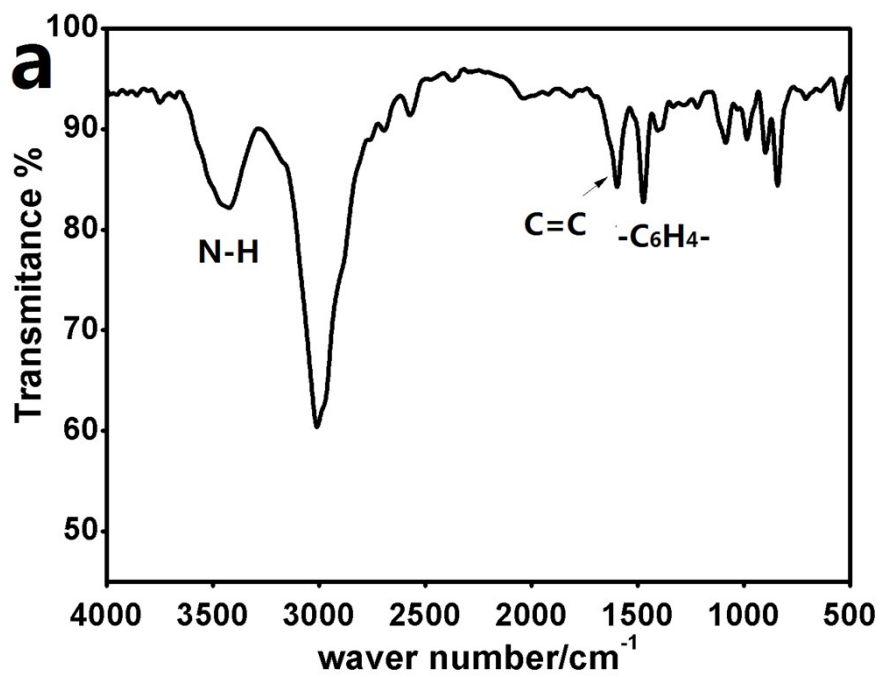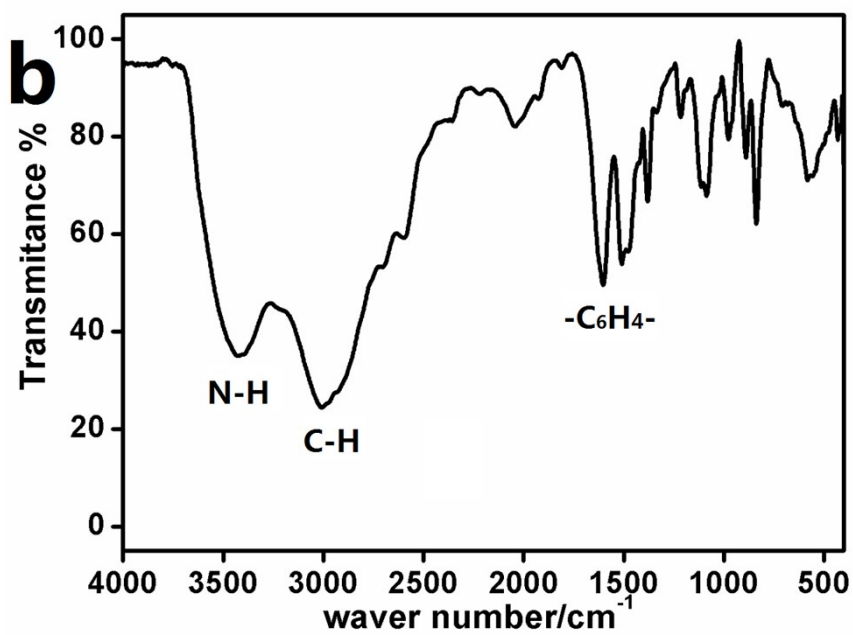

Figure S2. FT-IR image of 4-VBAHS (a) and PVBAHS (b).

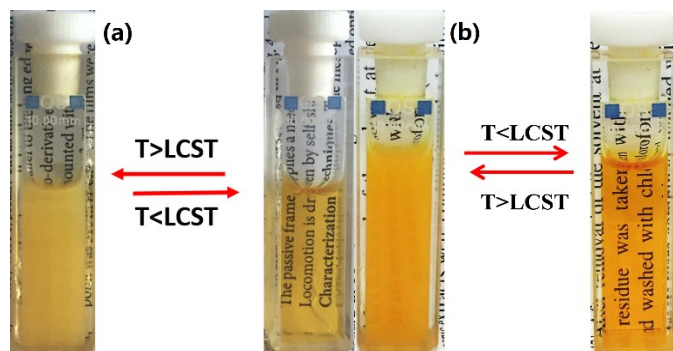

**Figure S3.** The optical images of turbidity transitions solution of monomer G1-Azo-CHO (a) and copolymer (b).

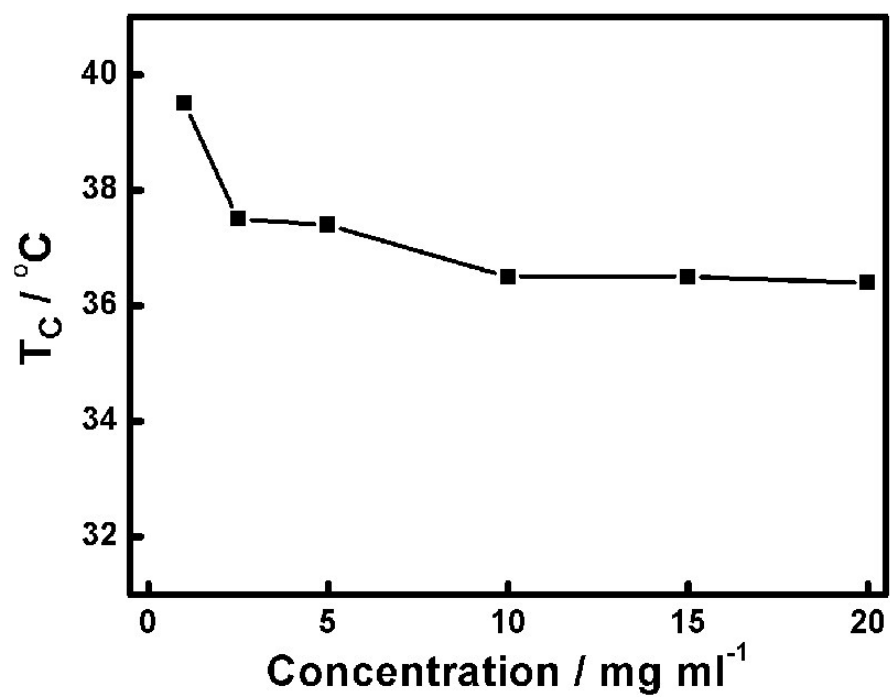

**Figure S4.** Concentration effects on the LCST of monomersolution.

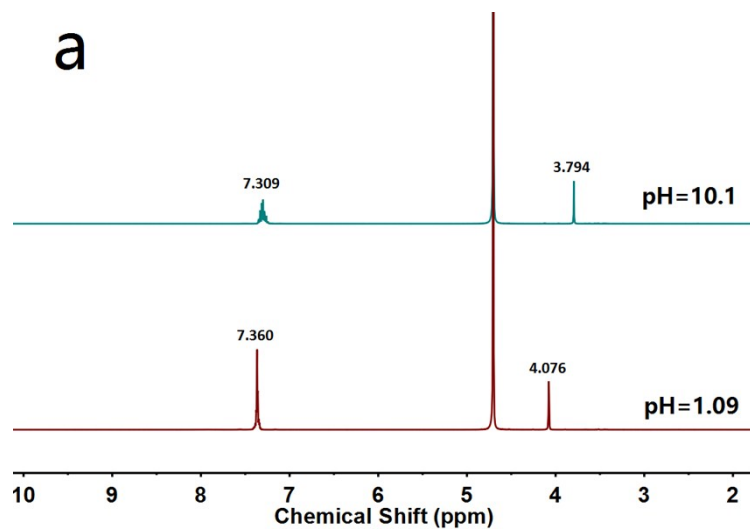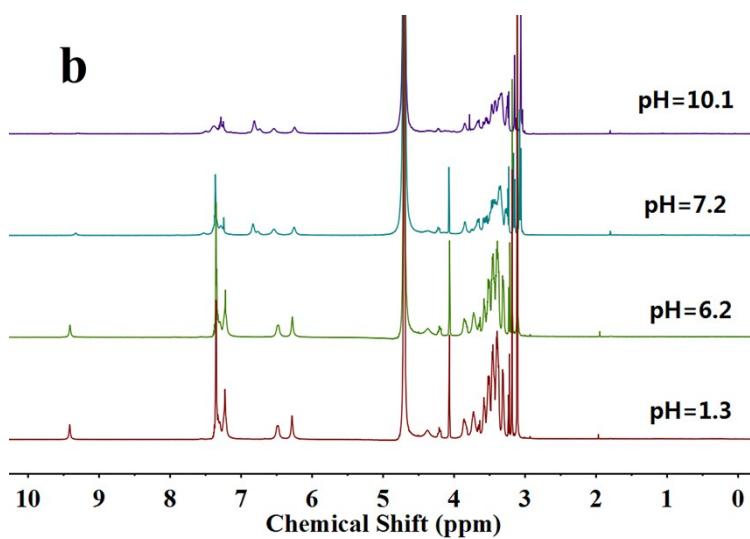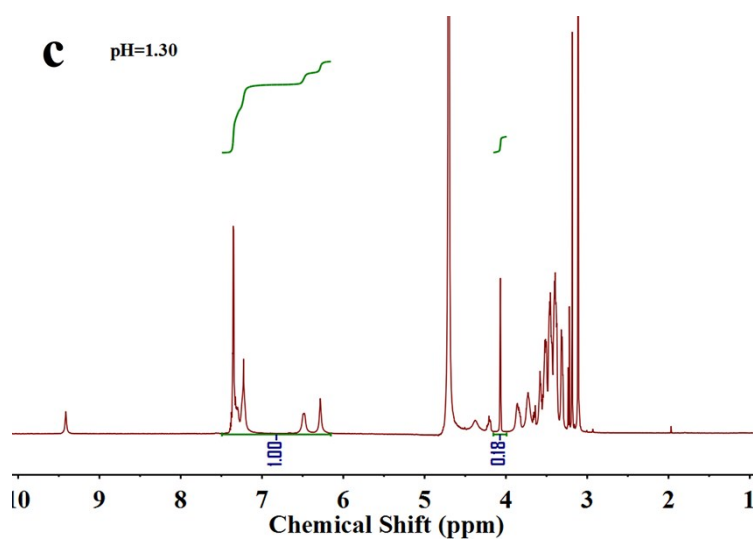

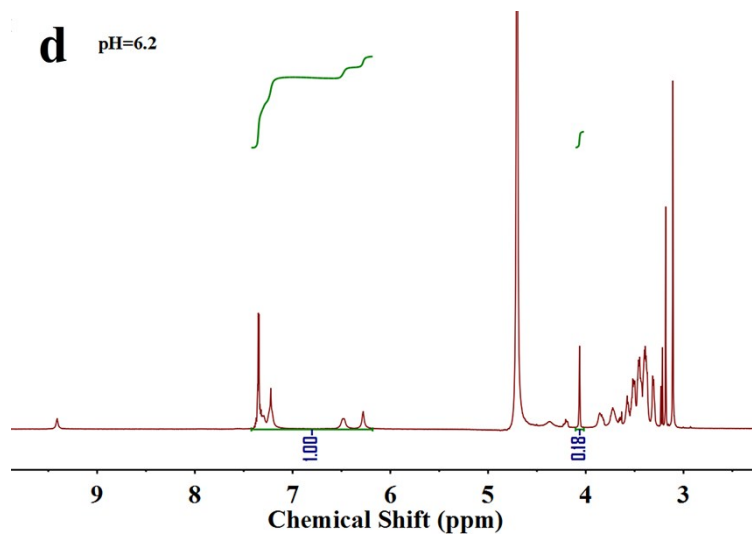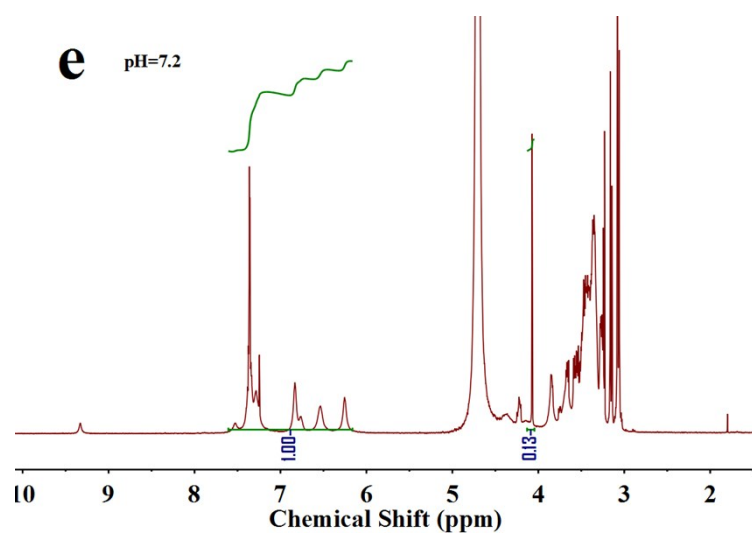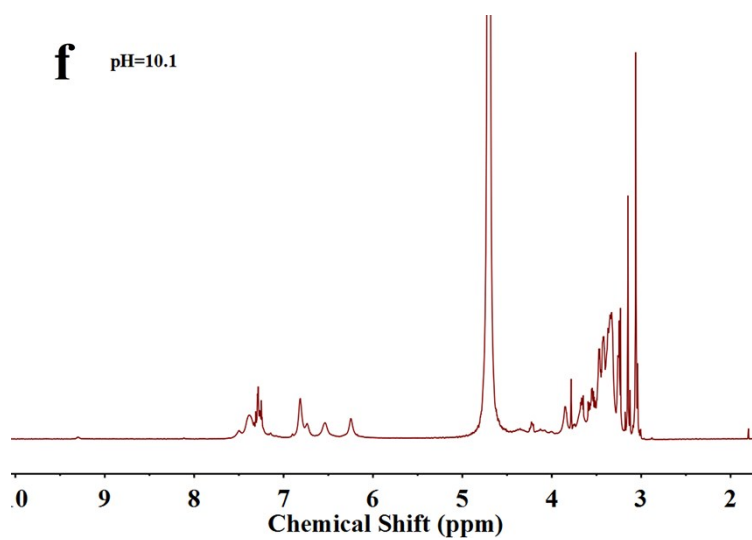



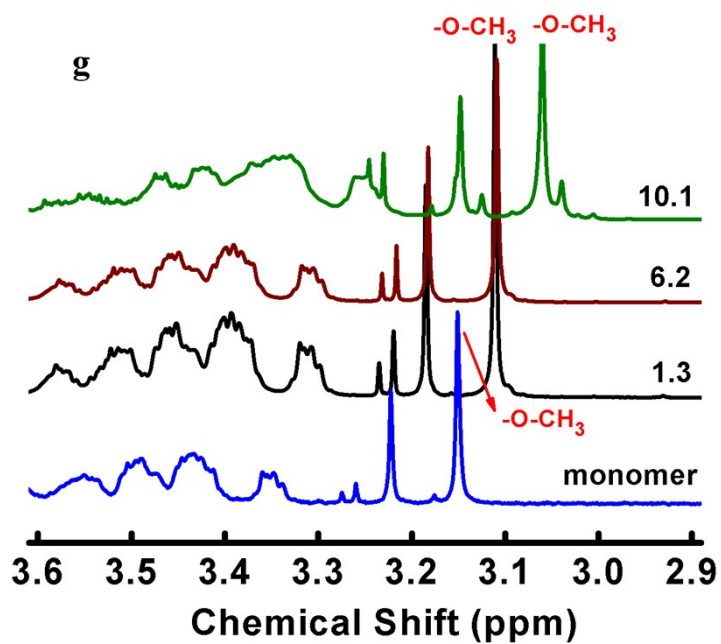

**Figure S5.** The chemical shift of benzylamine (a) and the chemical shift (b) of model system (the model self-assembly system were form by use the benzylamine to assembly with G1-Azo-CHO to illustrate the formation of hydrogen and imine bonds); The integral of chemical shift details of model system were in (c-f); (g) the details of chemical shift of monomer and the model system in pH=1.3,6.2,10.1.

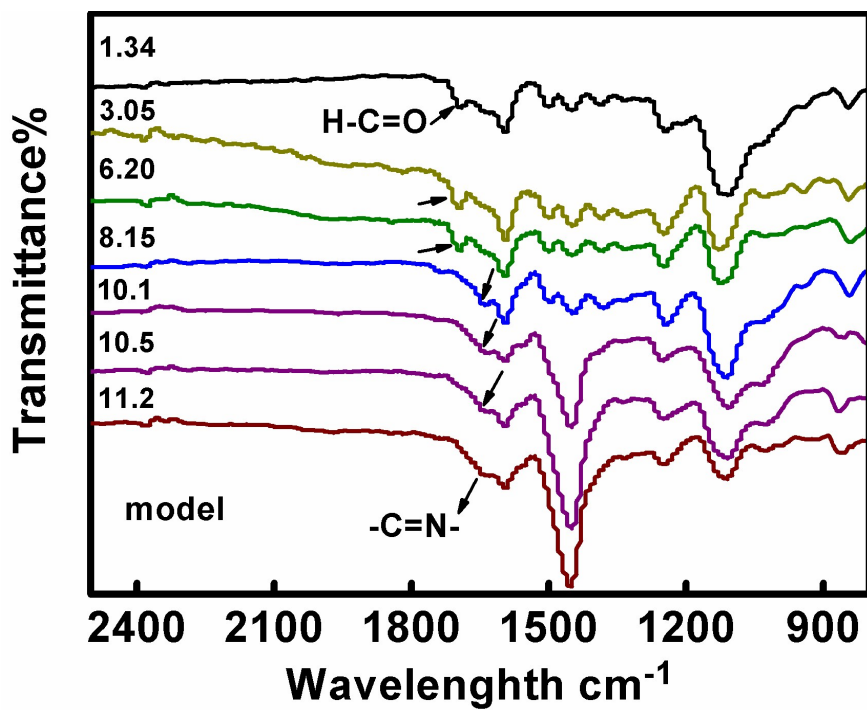

Figure S6. FT-IR spectrum of the model system in different pH.

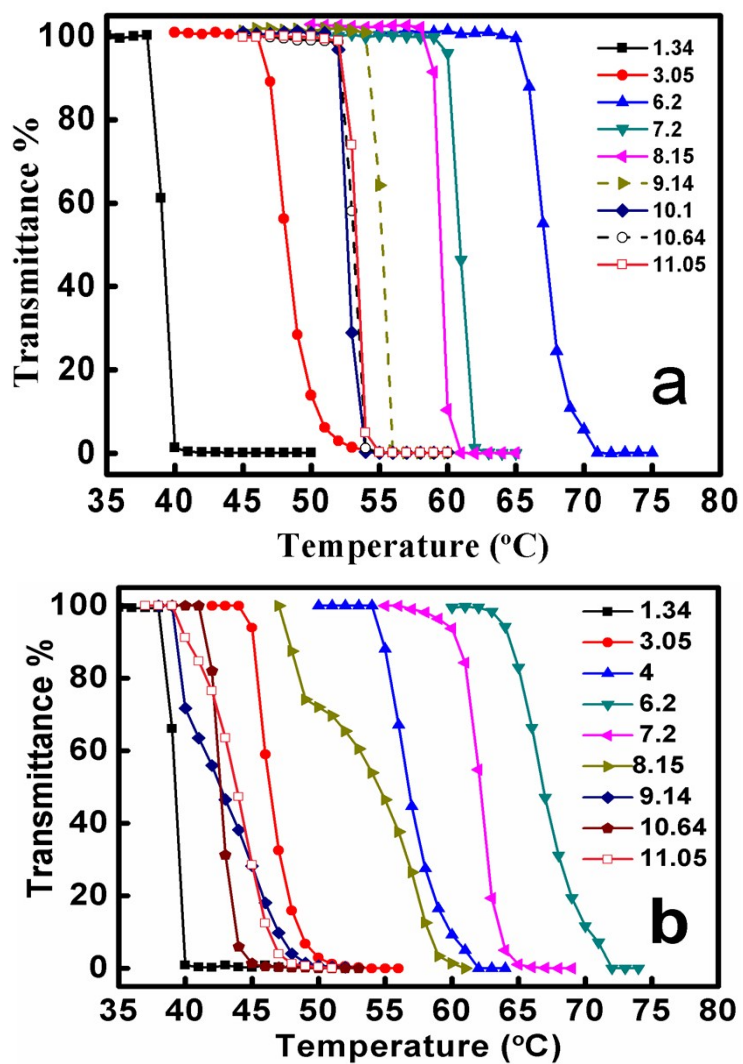

**Figure S7.** (a) The effect of pH on the LCST of dendronized copolymers aqueous solution before UV irradiation; (b) The effect of pH on the LCST of dendronized copolymers aqueous solution after UV irradiation.

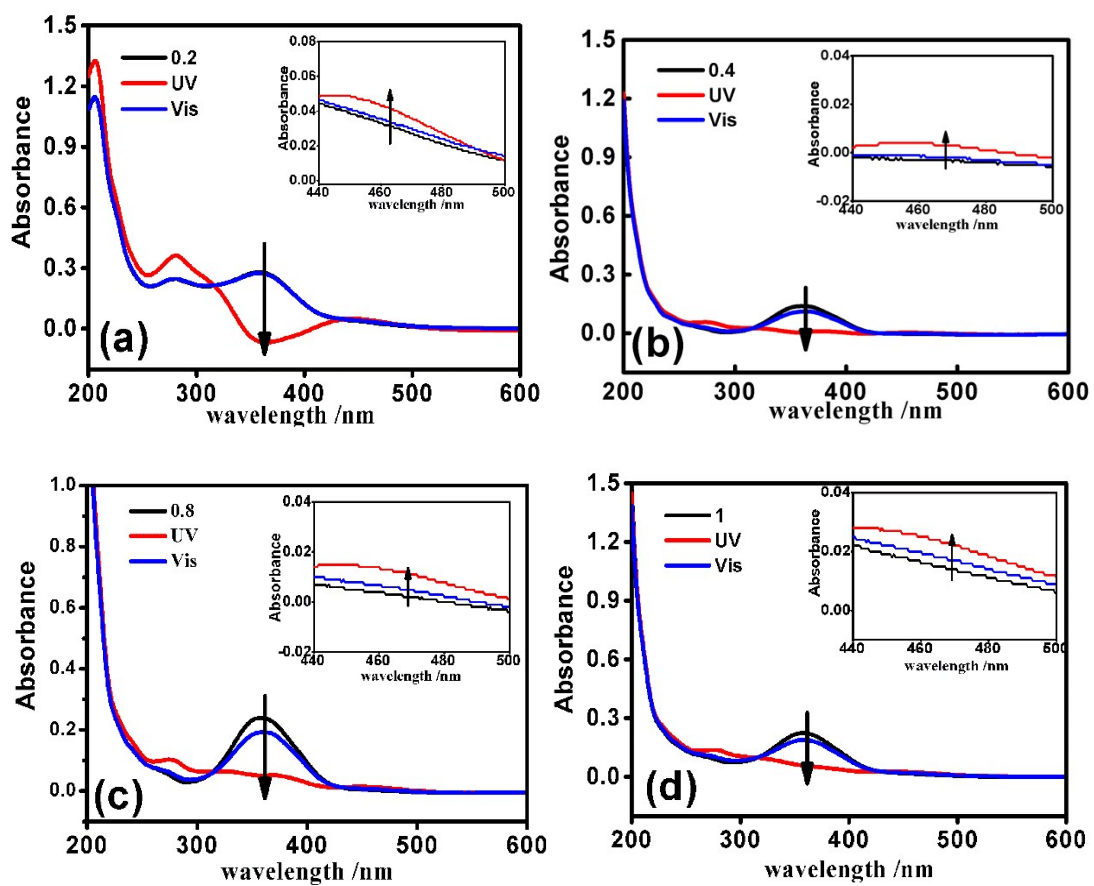

**Figure S8.** Absorption spectra of the self-assembly polymer at the molar ratio 0.2:1 (a), 0.4:1 (b), 0.8:1 (c), 1:1 (d).

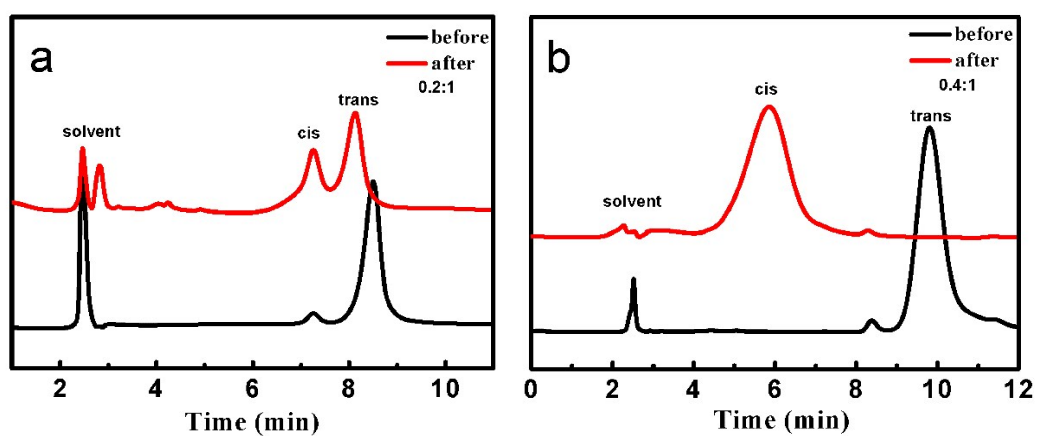

**Figure S9.** HPLC outflow curve of the copolymer (a) P<sub>0.2</sub> and (b) P<sub>0.4</sub> solution at the molar ratio 1:1(CH<sub>3</sub>OH/H<sub>2</sub>O: 80/20).

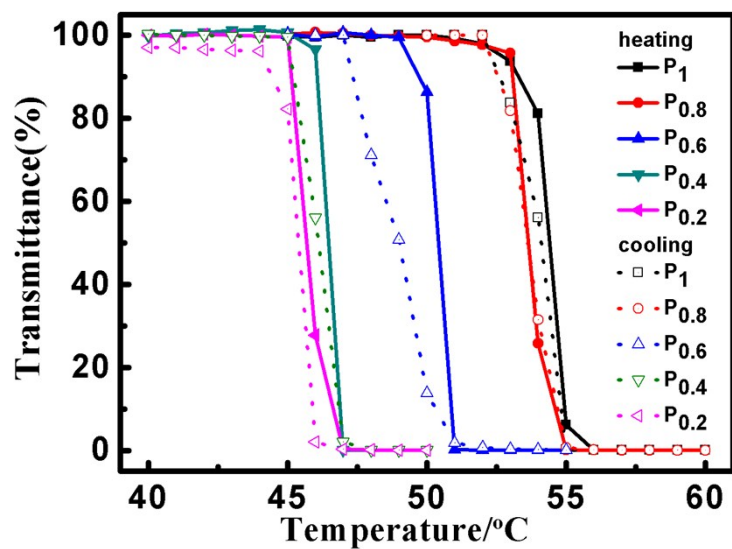

**Figure S10.** Thermo-responsive of self-assembly polymers with different CHO/NH<sub>2</sub> ratio in heating (solid line) and cooling (dot line) process.

**Table S1.** Raw material molar ratios for self-assembly of supramolecular dendronized copolymers

| Samples | Concentration of total materials (mg/mL) | Mw of the copolymers (g/mol) | $n_{\text{CHO}}/n_{\text{NH}_2}$ (mol/mol) <sup>a</sup> | LCST (°C) |         |
|---------|------------------------------------------|------------------------------|---------------------------------------------------------|-----------|---------|
|         |                                          |                              |                                                         | heating   | cooling |
| 1       | 5.0                                      | $7.1 \times 10^4$            | 1:1                                                     | 54.4      | 54.1    |
| 2       | 5.0                                      | $5.9 \times 10^4$            | 0.8:1                                                   | 53.5      | 53.5    |
| 3       | 5.0                                      | $4.7 \times 10^4$            | 0.6:1                                                   | 50.3      | 49.0    |
| 4       | 5.0                                      | $3.5 \times 10^4$            | 0.4:1                                                   | 46.5      | 46.1    |
| 5       | 5.0                                      | $2.4 \times 10^4$            | 0.2:1                                                   | 45.6      | 45.3    |
